# Supplementary material for: Rod-like nanostructures through amphiphilic OPE-porphyrin self-organization
Source: Royal Society of Chemistry journal article supplement (doi:10.1039/d3ob01385e), 2023-01-01
Supplement: d3ob01385e1.pdf [file d3ob01385e1.pdf]

COMMUNICATION

**Electronic Supporting Information**

*For*

**Rod-like nanostructures through amphiphilic OPE-Porphyrin self-organization**

Chiara M.A. Gangemi,<sup>†a</sup> Maria A. Castriciano,<sup>†a</sup> Ester D'Agostino,<sup>a</sup> Andrea Romeo,<sup>a</sup> Paola M. Bonaccorsi,<sup>a</sup> Anna Barattucci,<sup>\*a</sup>  
Luigi Monsù Scolaro<sup>\*a</sup>

## TABLE OF CONTENT

|                                                                                                    |                |
|----------------------------------------------------------------------------------------------------|----------------|
| <b>Experimental Section</b>                                                                        | <b>p. 2-5</b>  |
| <b>Figure S1 – S8 NMR Spectra</b>                                                                  | <b>p. 6-13</b> |
| <b>Figure S9 – S11 ESI/MS</b>                                                                      | <b>p. 14</b>   |
| <b>Figure S12</b> Absorption spectrum of GAP in chloroform and Beer's plot.                        | <b>p. 15</b>   |
| <b>Figure S13</b> Excitation and emission spectra of OPE 5 in chloroform                           | <b>p. 16</b>   |
| <b>Figure S14</b> CD spectrum of GAP in chloroform                                                 | <b>p. 17</b>   |
| <b>Figure S15</b> Absorption spectra of GAP in chloroform, chloroform/methanol 50/50 v/v, methanol | <b>p. 18</b>   |
| <b>Figure S16</b> RLS spectra of GAP in methanol and methanol/water 60/40 v/v                      | <b>p. 19</b>   |
| <b>Figure S17</b> DLS distribution of GAP in methanol/water 60/40 v/v                              | <b>p. 19</b>   |
| <b>Figure S18</b> Absorption spectrum of GAP in methanol/water 60/40 v/v and in presence of KI     | <b>p. 20</b>   |
| <b>Figure S19</b> AFM image and relative profile of GAP aggregates on silicon surface              | <b>p. 20</b>   |
| <b>References</b>                                                                                  | <b>p. 21</b>   |

**Chemicals.** All Chemicals and solvents were purchased from Merck and, when necessary, purified according to standard procedures. All the syntheses were monitored by TLC on commercially available precoated plates (silica gel 60 F254), and the products were visualized with vanillin [1 g dissolved in MeOH (60 mL) and conc. H<sub>2</sub>SO<sub>4</sub> (0.6 mL)] under UV lamp illumination. Silica gel 60 was used for column chromatography.

**Instrumentation.** Proton (<sup>1</sup>H) and carbon (<sup>13</sup>C) NMR spectra were recorded on a Varian 500 spectrometer (at 500 MHz for <sup>1</sup>H; and 125 MHz for <sup>13</sup>C) using CDCl<sub>3</sub> and, when necessary, MeOD as cosolvents. Chemical shifts are given in parts per million (ppm) (δ) relative to CDCl<sub>3</sub> δ 7.26 ppm for proton and 77.16 ppm for carbon), coupling constants (J) are given in hertz, and the attributions are supported by heteronuclear single-quantum coherence (HSQC) and correlation spectroscopy (COSY) experiments. Mass analysis for final compound (4, 5 and GAP) were performed with a TSQ-Quantum access Triple Quadrupole Mass Spectrometer (Thermo Fisher Scientific, Waltham, MA, USA), equipped with a HESI (Heated ElectroSpray Ionization) source; analyses were run in positive mode. Mass spectrometer parameters were: sheath gas flow rate, 30 (arbitrary units); aux gas flow rate, 15 (arbitrary units); spray voltage, 5.00 kV; capillary temperature, 250° C; tube lens voltage, 55 V; heater temperature, 270° C; scan mode: full scan. UV/vis spectra were obtained on an Agilent model 8453 diode array spectrophotometer using 0.001–1 cm path length quartz cell. When CHCl<sub>3</sub> is used as the solvent, in order to avoid the formation of hydrochloric acid generated at the interface between the light-exposed silica wall and the bulk solvent, a cell with the pure solvent, as neutral filter, was placed on the observation

path in the diode array setup between the lamp and the sample cell.<sup>1</sup> A rapid protonation of the porphyrin core and consequent formation of the porphyrin diacid species is clearly evident when filter is absent. Luminescence and resonance light scattering (RLS) spectra were recorded on a Jasco FP-750 spectrofluorimeter adopting a synchronous scan protocol specifically for RLS experiments. The depolarization ratio is defined as  $\rho_V(90) = I_{VH}/I_{VV}$ , where  $I_{VH}$  and  $I_{VV}$  are the scattered light intensities with horizontal and vertical polarization, respectively. The different transmission efficiency of polarized light by both excitation and emission monochromators has been accounted for by correcting the  $I_{VH}$  value through the equation  $\rho_V(90) = G \times I_{VH}/I_{VV}$ , where  $I_{VH}$ , where  $G = I_{HV}/I_{HH}$  is a correction factor. Assuming a parallel arrangement of the transition moments of the exciton-coupled chromophores and applying the model (ref. 45 in the main text) we have calculated the slip angle between adjacent porphyrin planes. The emission spectra were corrected for the absorption of the samples. Time-resolved fluorescence emission measurements were performed on a Jobin Yvon-Spex Fluoromax 4 spectrofluorimeter, using time-correlated single-photon counting technique. The excitation source was a NanoLED at 390, 450 e 590 nm. Dynamic light scattering (DLS) measurements were performed with a Malvern Zetasizer Nano ZS equipped with a 633-nm He-Ne laser and operating at an angle of 173°. The software used to collect and analyze the data was the Dispersion Technology Software from Malvern. For each sample, 15 runs of 10 s were performed, with three repetitions for all the samples. The intensity size distribution, the Z-average diameter (Z-ave), and the polydispersity index (Pdl) were obtained from the autocorrelation function using the “general purpose mode.”

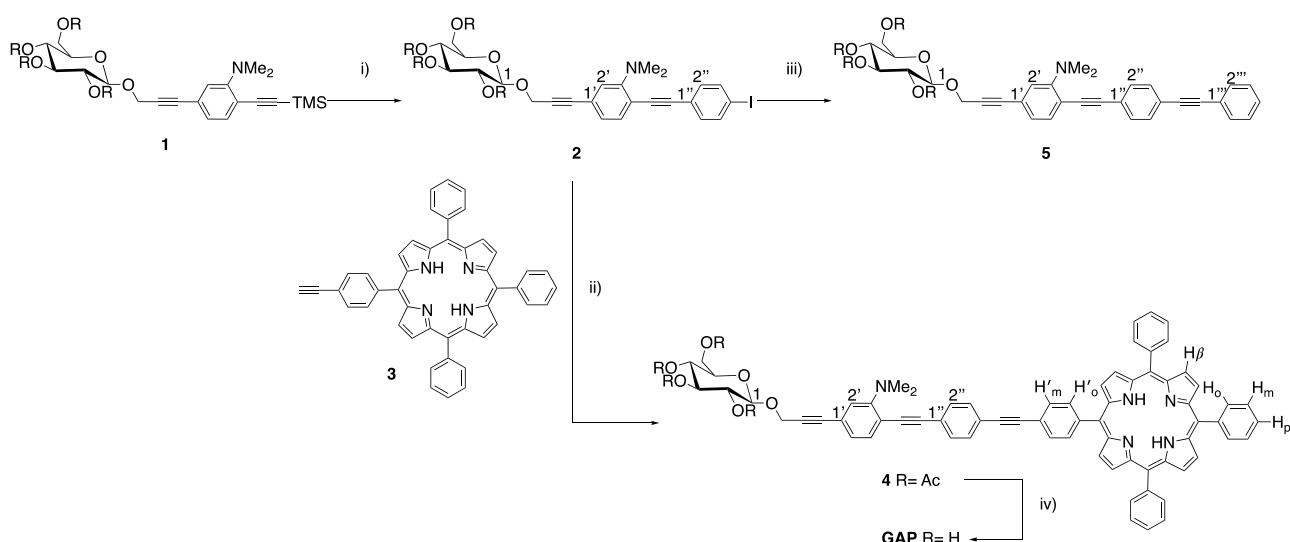

*i)* 1,4-diiodobenzene, Pd(PPh<sub>3</sub>)<sub>4</sub>, Ag<sub>2</sub>O, THF/DMF (1/1), 60°C, 1h 30 min; *ii)* Pd(PPh<sub>3</sub>)<sub>4</sub>, Et<sub>3</sub>N, DMF, 70°C, 1 h 30 min; *iii)* Ethynylbenzene, Pd(PPh<sub>3</sub>)<sub>4</sub>, Et<sub>3</sub>N, DMF, 70°C, 2 h; *iv)* NH<sub>4</sub>OHaq, MeOH/THF (1/1), RT, overnight.

Compound 2. Compound 1<sup>2</sup> (0.480 g; 0.8 mmol; 1 eq.), 1,4-diiodobenzene (1.18 g; 3.6 mmol; 4.5 eq.), Ag<sub>2</sub>O (0.181 g, 0.8 mmol; 1 eq.) and Pd(PPh<sub>3</sub>)<sub>4</sub> (0.081 g, 0.08 mmol, 0.1 eq.) were suspended in dry DMF (6 mL) and dry THF (6 mL). The mixture was heated at 60°C and maintained under continuous stirring under Ar atmosphere for 1h 30 min, until the disappearance of 1 by TLC (CH<sub>2</sub>Cl<sub>2</sub>/Ethyl acetate 95/5). After evaporation of the solvents, the crude product was purified by column chromatography on silica gel with CH<sub>2</sub>Cl<sub>2</sub>/Ethyl acetate 98/2 as eluant (TLC R<sub>f</sub>=0.50 CH<sub>2</sub>Cl<sub>2</sub>/Ethyl acetate 97/3). Yield 60%. <sup>1</sup>H-NMR (500MHz, CDCl<sub>3</sub>) δ 7.69 and 7.25 (4H, d, *J*=7.5 Hz, H-2'', H-3'', H-5'', H-6''), 7.41 (2H, d, *J*=7.5 Hz, H-6'), 7.01-6.92 (3H, m, H-2', H-5'),

5.27 (1H, t,  $J_{2,3}=J_{3,4}=9.3$  Hz, H-3), 5.13 (1H, t,  $J_{3,4}=J_{4,5}=9.3$  Hz, H-4), 5.04 (1H, dd,  $J_{1,2}=8.1$  Hz,  $J_{2,3}=9.3$  Hz, H-2), 4.85 (1H, d,  $J_{1,2}=8.1$  Hz, H-1), 4.60 (2H, coalescent AB system,  $\text{CH}_2\text{C}\equiv$ ), 4.29 and 4.17 (2H, split AB system,  $J_{5,6A}=4.5$  Hz,  $J_{5,6B}=2.1$  Hz,  $J_{6A,6B}=12.3$  Hz, H<sub>2</sub>-6), 3.79-3.74 (1H, m, H-5), 3.01 (6H, s,  $\text{N}(\text{CH}_3)_2$ ), 2.08, 2.06, 2.03 and 2.01 (12H, s,  $\text{CH}_3\text{CO}$ ).  $^{13}\text{C}$ -NMR (125 MHz,  $\text{CDCl}_3$ )  $\delta$  170.7, 170.3, 169.5, 169.4, 137.9, 137.5, 136.3, 135.5, 134.3, 123.7, 122.9, 115.3, 98.5, 94.1, 89.9, 87.2, 85.6, 72.8, 71.9, 71.2, 68.4, 61.8, 56.9, 43.3, 30.9, 29.7, 20.8, 20.7, 20.6 and 20.5.

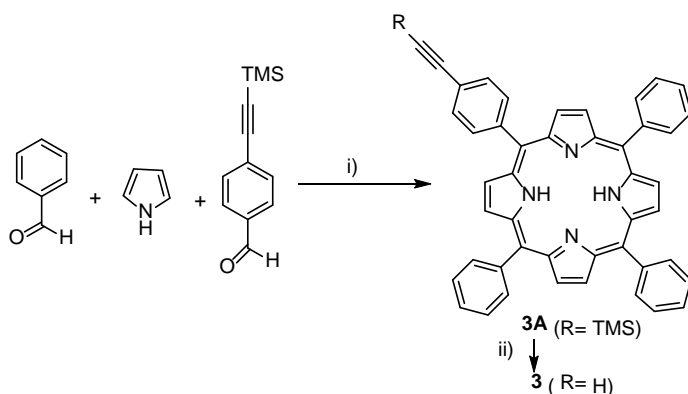

i)  $\text{CH}_3\text{CH}_2\text{COOH}$ , reflux, 1h; ii)  $\text{K}_2\text{CO}_3$ , EtOH/THF, reflux, 2h.

Compound **3**<sup>3</sup> In a 100mL flask 4-((trimethylsilyl)ethynyl)-benzaldehyde (0.296g, 1.34 mmol, 1 eq.) and benzaldehyde (0.8 mL, 7.8 mmol, 5.8 eq.) in propionic acid (40mL); the reaction mixture was heated to reflux temperature (140°C) and pyrrole was added (0.7 mL, 9.10 mmol, 6.8 eq.). The reaction was left under stirring for 1h. The solvent was removed under vacuum and the crude taken up with  $\text{CHCl}_3$ . The organic solution was washed three times (x2 100 mL  $\text{NaHCO}_{3\text{sat}}$ ; x1 with 100 mL Brine). The organic phase was dried over  $\text{Na}_2\text{SO}_4$ , filtered and the solvent removed under reduced pressure. The crude product was then solubilized in hexane/dichloromethane 1/1 and filtered on alumina. The crude was purified via chromatography (Silica Gel; hexane/toluene 1:1) to give **3A**<sup>4</sup> in 15.4% yield. **3A** (0.125 g, 0.19 mmol) and 0.056 mg of  $\text{K}_2\text{CO}_3$  (0.41 mmol) were suspended in 20 mL of EtOH/THF 1/3. The mixture was kept under continuous stirring at reflux temperature for 2h, until disappearance of the starting product by TLC (hexane/ $\text{CH}_2\text{Cl}_2$  1/1). The reaction crude was filtered and the solid was washed on the filter with  $\text{CH}_2\text{Cl}_2$  and  $\text{CHCl}_3$ . After drying of the mother liquors on anhydrous  $\text{Na}_2\text{SO}_4$ , evaporation under vacuum gave **3** in 42.2% yield.

Compound **4**. Porphyrin derivative **3** (0.100 g, 0.15 mmol, 2.5 eq.), compound **2** (0.040 g, 0.06 mmol, 1 eq.),  $\text{Pd}(\text{PPh}_3)_4$  (8 mg,  $6.8 \times 10^{-6}$  mol, 0.12 eq.) and dry  $\text{Et}_3\text{N}$  (1 mL) were dissolved in dry DMF (1 mL). The mixture was heated at 70°C and maintained under continuous stirring under Ar atmosphere for 1h 30 min, until the disappearance of **2** by TLC ( $\text{CH}_2\text{Cl}_2$ /Ethyl acetate 95/5). After evaporation of the solvent, the crude product was purified by column chromatography on silica gel with  $\text{CH}_2\text{Cl}_2$ /Ethyl acetate 98/2 as eluant (TLC  $R_f=0.70$   $\text{CH}_2\text{Cl}_2$ /Ethyl acetate 97/3). Yield 58%.  $^1\text{H}$ -NMR (500 MHz,  $\text{CDCl}_3$ )  $\delta$  8.89-8.87 (8H, m,  $\text{H}_\beta$  pyr), 8.24 (8H, m,  $\text{H}_o$ ,  $\text{H}'_o$ ), 7.94 (2H, d,  $J=8.0$  Hz,  $\text{H}'_m$ ); 7.79 (9H, m,  $\text{H}_m$ ,  $\text{H}_p$ ), 7.67 and 7.60 (4H, AA'XX' system,  $J=8.0$  Hz, H-2", H-3", H-5", H-6"), 7.47 (1H, d,  $J=7.5$ , H-6'), 7.08 (1H, s, H-2'), 7.01 (1H, d,  $J=7.5$  Hz, H-5'), 5.30 (1H, t,  $J_{2,3}=J_{3,4}=9.3$  Hz, H-3), 5.16 (1H, t,  $J_{3,4}=J_{4,5}=9.3$  Hz, H-4), 5.08 (1H, dd,  $J_{1,2}=8.1$  Hz,  $J_{2,3}=9.3$  Hz, H-2), 4.87 (1H, d,  $J_{1,2}=8.1$  Hz, H-1), 4.63 (2H, coalescent AB system,  $\text{CH}_2\equiv\text{C}$ ), 4.31 and 4.17 (2H, split AB system,  $J_{5,6A}=4.5$  Hz,  $J_{5,6B}=2.1$  Hz,  $J_{6A,6B}=12.3$  Hz, H<sub>2</sub>-6), 3.80- 3.77 (1H, m, H-5), 3.06 (6H, s,  $\text{N}(\text{CH}_3)_2$ ), 2.12, 2.10, 2.06 and 2.04 (12H, s,  $\text{CH}_3\text{CO}$ ), -2.76 (2H, s, NH pyr).  $^{13}\text{C}$ -NMR (125MHz  $\text{CDCl}_3$ )  $\delta$  170.6, 170.3, 169.5, 169.4, 154.5, 142.6, 142.2, 134.6, 134.5, 134.3, 131.8, 131.7, 131.5, 131.3, 130.0, 127.7, 126.6, 123.6, 123.5, 123.1, 122.9, 122.5, 120.4, 120.3, 120.1, 119.0, 115.3, 98.4, 96.2, 91.3, 90.5, 90.3, 87.2, 84.6, 72.8, 71.9, 71.1, 68.3, 61.8, 56.9, 43.3, 20.8, 20.7, 20.6 and 20.5. ESI (m/z)  $[\text{M}+\text{H}]^+$  calcd for  $\text{C}_{79}\text{H}_{64}\text{N}_5\text{O}_{10}^+$  1242.46, found: 1242.42. UV-vis ( $\text{CHCl}_3$ ):  $\lambda_{\text{max}} = 278$  nm, 327 nm, 370 nm, 421 nm, 517 nm, 552 nm, 592 nm, 647 nm. Fluorescence Emission ( $\text{CHCl}_3$ ): 654 nm, 718 nm.

Compound **5**. Ethynylbenzene (0.060 g, 0,6 mmol, 5 eq.), compound **2** (0,090 g, 0,12 mmol, 1 eq.), Pd(PPh<sub>3</sub>)<sub>4</sub> (0.004 g, 0,012 mmol, 0.1 eq.) and dry Et<sub>3</sub>N (1 mL) were dissolved in dry DMF (1 mL).<sup>5</sup> The mixture was heated at 70 °C and maintained under continuous stirring under Ar atmosphere for 2 hours, until the disappearance of **2** by TLC (CH<sub>2</sub>Cl<sub>2</sub>/Ethyl acetate 95/5). After evaporation of the solvent, the crude product was purified by column chromatography on silica gel with CH<sub>2</sub>Cl<sub>2</sub>/Ethyl acetate 98/2 as eluant (TLC R<sub>f</sub>=0.50 CH<sub>2</sub>Cl<sub>2</sub>/Ethyl acetate 99/1). Yield 67%. <sup>1</sup>H-NMR (500 MHz, CDCl<sub>3</sub>) δ 7.60-7.47 (6H, m, H-2'', H-3'', H-5'', H-6'', H-2''', H-6'''), 7.42 (1H, d, *J*=7.5 Hz, H-6'), 7.40-7.30 (3H, m, H-3''', H-4''', H-5'''), 7.03-6.88 (2H, m, H-5', H-2') 5.27 (1H, t, *J*<sub>2,3</sub>=*J*<sub>3,4</sub>= 9.3 Hz, H-3), 5.13 (1H, t, *J*<sub>3,4</sub>=*J*<sub>4,5</sub>= 9.3 Hz, H-4), 5.04 (1H, dd, *J*<sub>1,2</sub>=8.1 Hz, *J*<sub>2,3</sub>= 9.3 Hz, H-2), 4.85 (1H, d, *J*<sub>1,2</sub>=8.1 Hz, H-1), 4.60 (2H, coalescent AB system, CH<sub>2</sub>C≡), 4.29 and 4.17 (2H, split AB system, *J*<sub>5,6A</sub>= 4.5 Hz, *J*<sub>5,6B</sub>= 2.1 Hz, *J*<sub>6A,6B</sub>= 12.3 Hz, H<sub>2</sub>-6), 3.79-3.74 (1H, m, H-5), 3.01 (6H, s, N(CH<sub>3</sub>)<sub>2</sub>), 2.08, 2.06, 2.03 and 2.01 (12H, s, CH<sub>3</sub>CO). <sup>13</sup>C-NMR (125 MHz, CDCl<sub>3</sub>) δ 170.8, 170.3, 169.5, 169.4, 154.5, 134.3, 131.6, 131.5, 131.2, 128.5, 128.4, 123.6, 123.3, 123.1, 123.0, 122.8, 120.3, 115.4, 98.4, 96.2, 91.3, 90.4, 89.1, 87.2, 84.5, 72.8, 71.9, 71.2, 68.4, 61.8, 57.1, 43.3, 20.8, 20.7, 20.6, 20.5. ESI (m/z) [M+H]<sup>+</sup> calcd for C<sub>41</sub>H<sub>40</sub>NO<sub>10</sub><sup>+</sup> 706.26, found: 706.33.

**GAP**. Compound **4** (0.05 g, 0.02 mmol, 1eq.) was dissolved in MeOH (2 mL) and THF (2 mL), then a large excess of aqueous ammonia (28% w/v, 1 mL) was slowly added. The reaction was maintained under continuous stirring at room temperature overnight, until the disappearance of compound **4** by TLC (CH<sub>2</sub>Cl<sub>2</sub>/Ethyl acetate 99/1). The solvents were removed under reduced pressure. The recovered solid underwent washings with Et<sub>2</sub>O (3 mL x 3) to eliminate undesired acetamide. **GAP** was obtained in quantitative yield. <sup>1</sup>H NMR (500 MHz, CDCl<sub>3</sub>/CD<sub>3</sub>OD 13/1) δ 8.8-8.6 (8H, br s, H<sub>β</sub>-pyr), 8.2-8.16 (8H, m, H<sub>o</sub>, H'<sub>o</sub>), 7.77 (2H, d, *J*=8.0 Hz, H'<sub>m</sub>), 7.74-7.64 (9H, m, H<sub>m</sub>, H<sub>p</sub>), 7.64 and 7.53 (4H, d, *J*= 8.0 Hz, H-2'', H-3'', H-5'', H-6''), 7.40 (1H, d, *J*= 7.5 Hz, H-6'), 6.97 (1H, s, H-2'), 6.94 (1H, d, *J*= 7.5 Hz, H-5'), 4.63 and 4.59 (2H, AB system, *J*=12.3 Hz, CH<sub>2</sub>C≡C), 4.50 (1H, d, *J*=8.0 Hz, H-1), 3.90-3.40 (2H, m, H<sub>2</sub>-6), 3.52- 3.12 (4H, m, H-2, H-3, H-4, H-5), 2.97 (6H, s, N(CH<sub>3</sub>)<sub>2</sub>). <sup>13</sup>C NMR (125 MHz, CDCl<sub>3</sub>/CD<sub>3</sub>OD 13/1) δ 154.3, 142.3, 141.9, 134.5, 134.4, 134.1, 131.6, 131.3, 131.1, 129.8, 129.6, 127.6, 126.6, 123.7, 123.4, 123.0, 122.9, 122.4, 120.2, 118.9, 115.3, 101.0, 96.0, 91.1, 90.3, 90.2, 86.7, 85.1, 76.2, 75.8, 73.3, 69.8, 61.6, 57.0, 43.2. ESI (m/z) [M+H]<sup>+</sup> calcd for C<sub>71</sub>H<sub>56</sub>N<sub>5</sub>O<sub>6</sub><sup>+</sup> 1074.42, found: 1074.42. UV-vis (CHCl<sub>3</sub>): λ<sub>max</sub> = 288 nm, 327 nm, 370 nm, 421 nm, 517 nm, 552 nm, 592 nm, 647 nm. Fluorescence Emission (CHCl<sub>3</sub>): 654 nm, 718 nm.

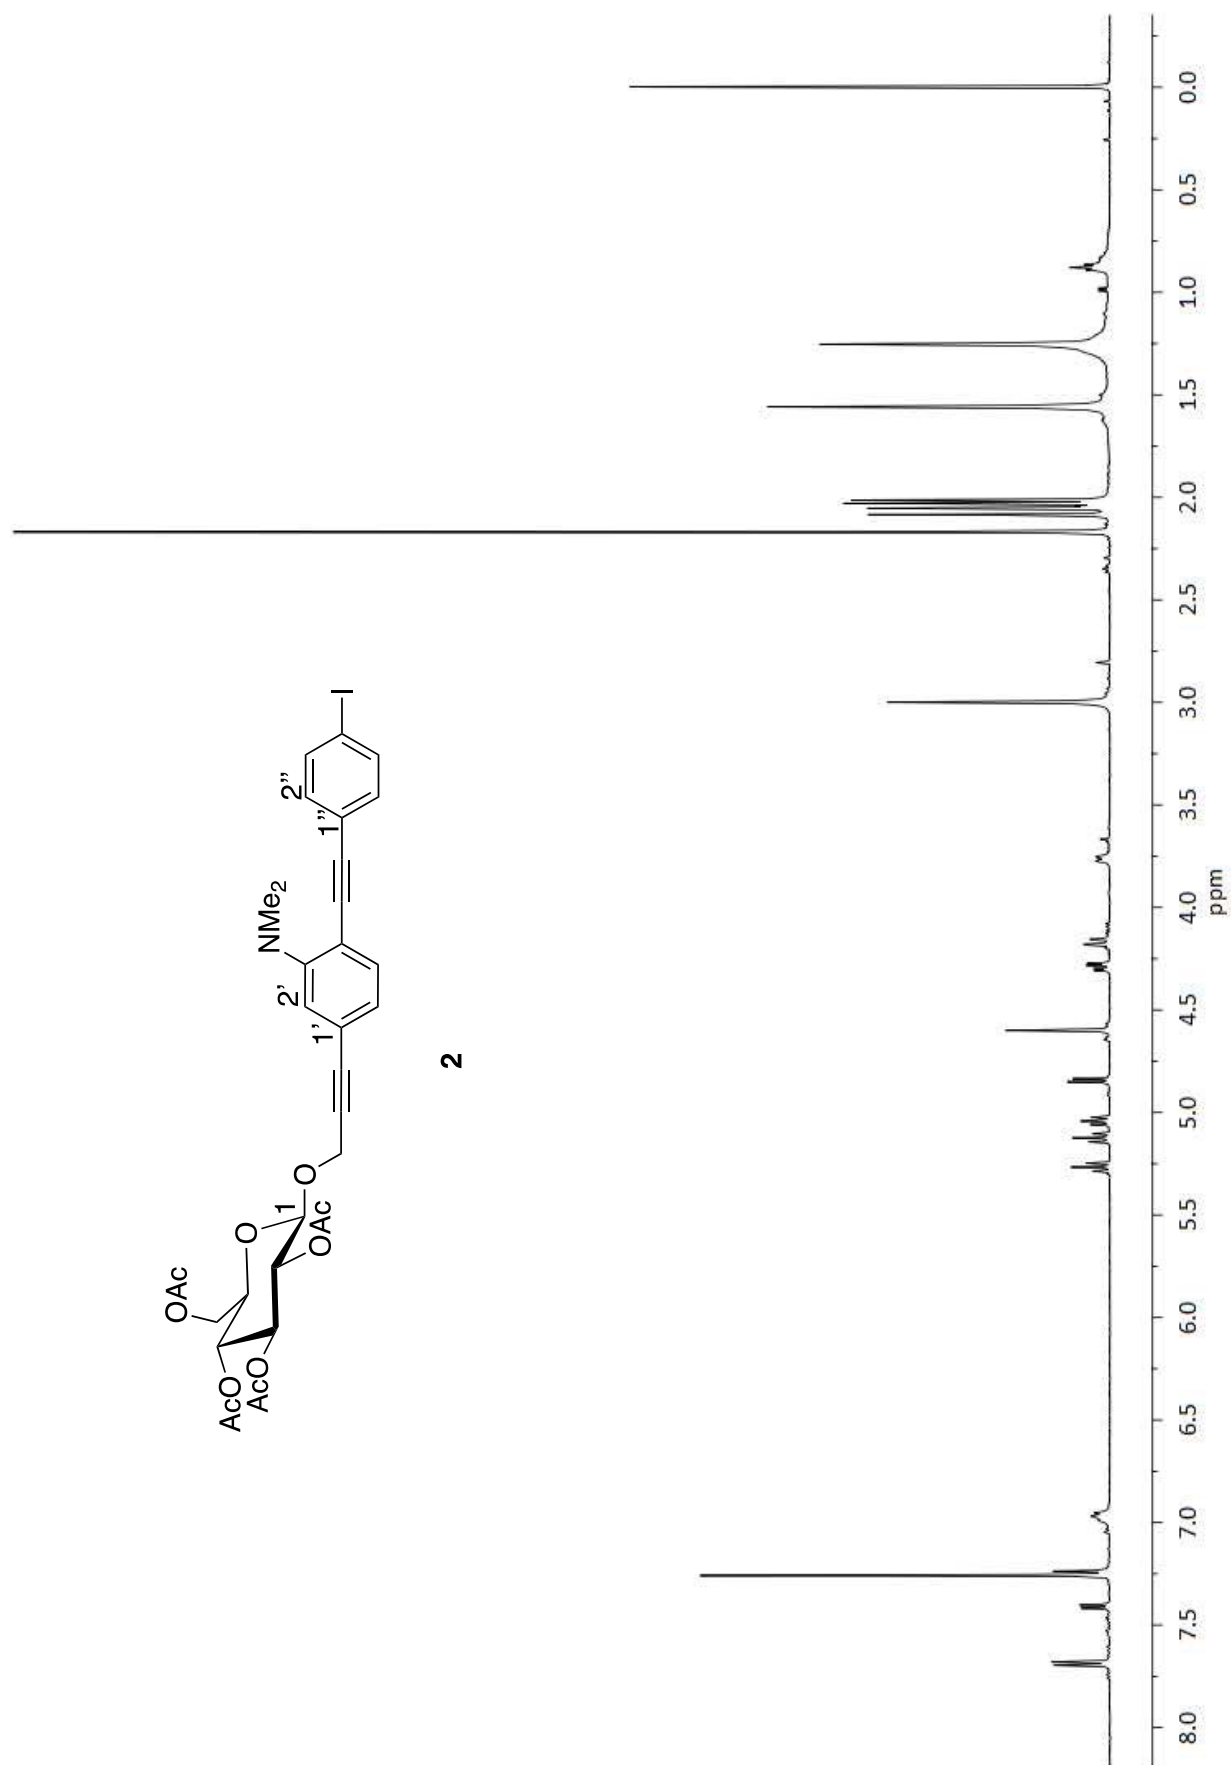

**Figure S1** <sup>1</sup>H NMR of compound **2** in CDCl<sub>3</sub>

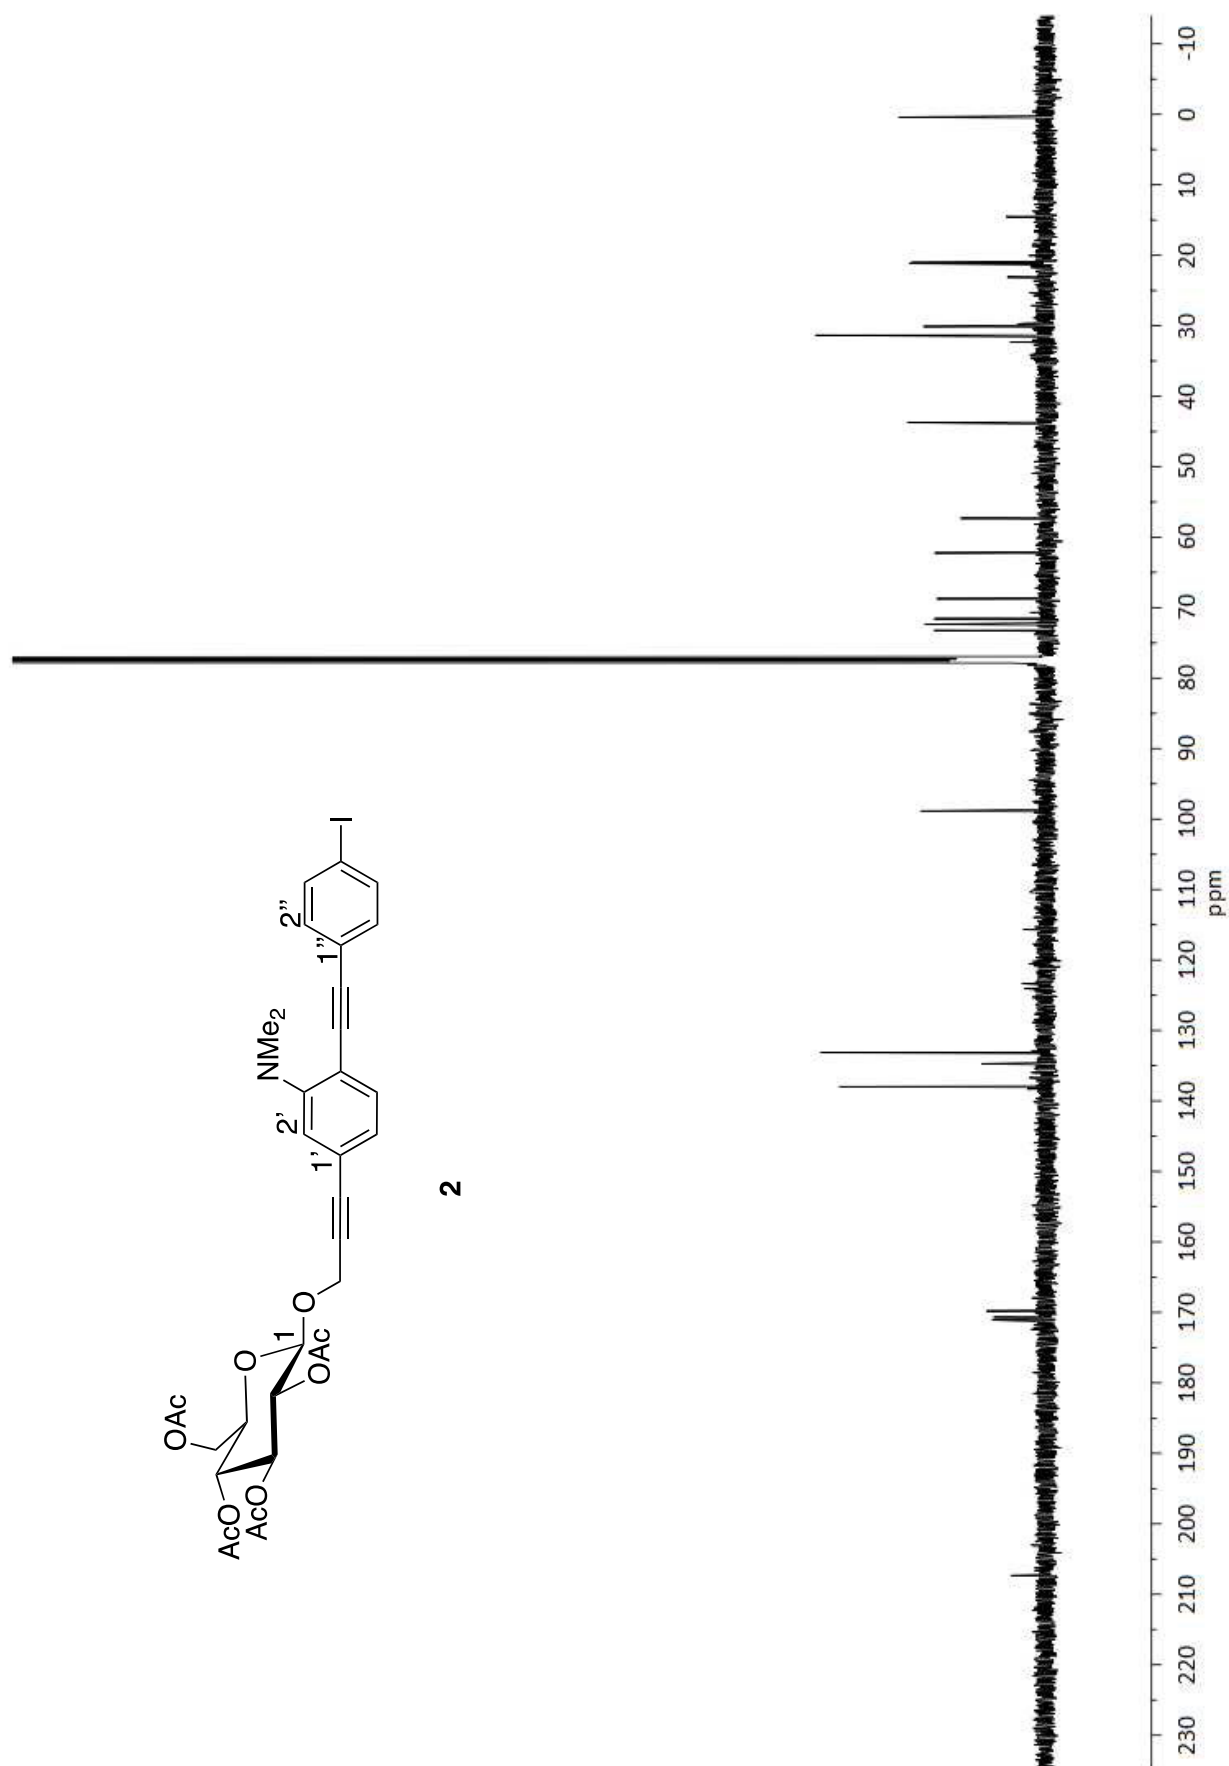

Figure S2.  $^{13}\text{C}$  NMR of compound **2** in CDCl<sub>3</sub>

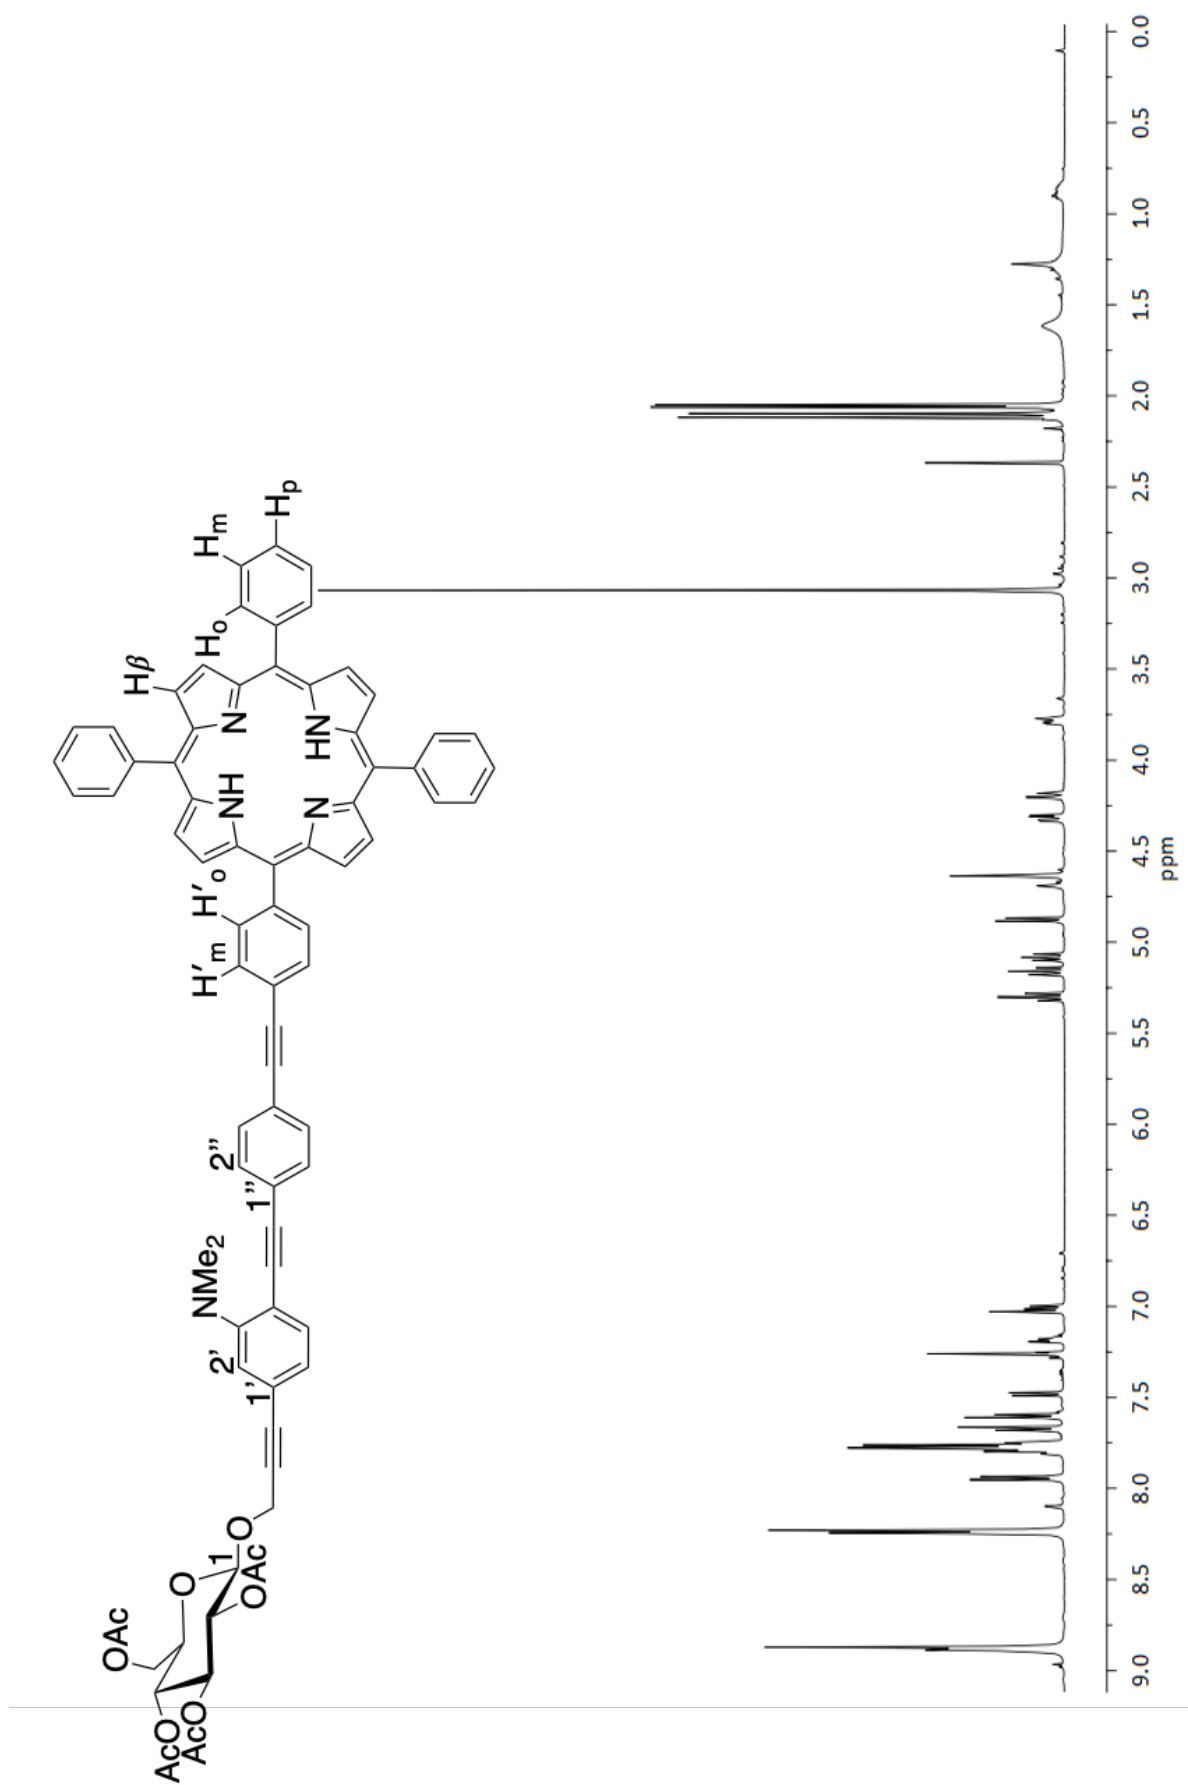

Figure S3. <sup>1</sup>H NMR of compound 4 in CDCl<sub>3</sub>



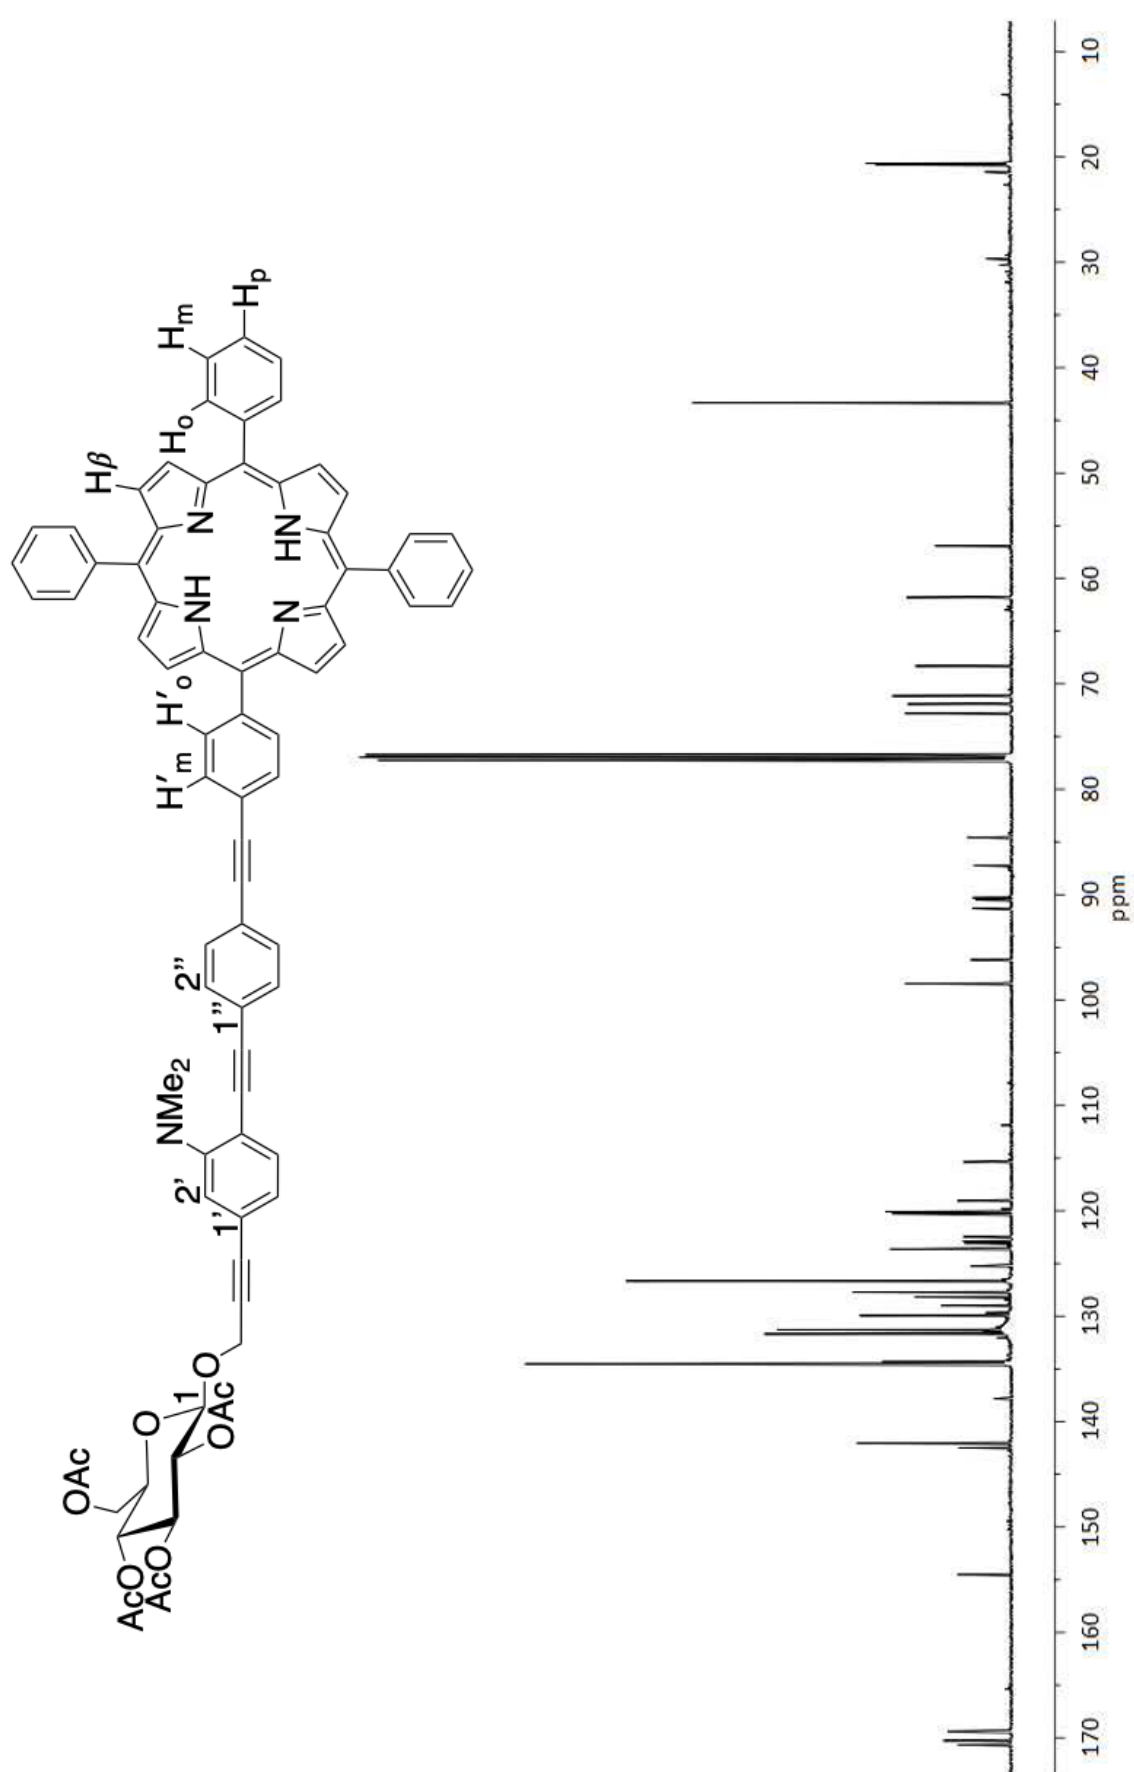

Figure S4.  $^{13}\text{C}$  NMR of compound 4 in  $\text{CDCl}_3$

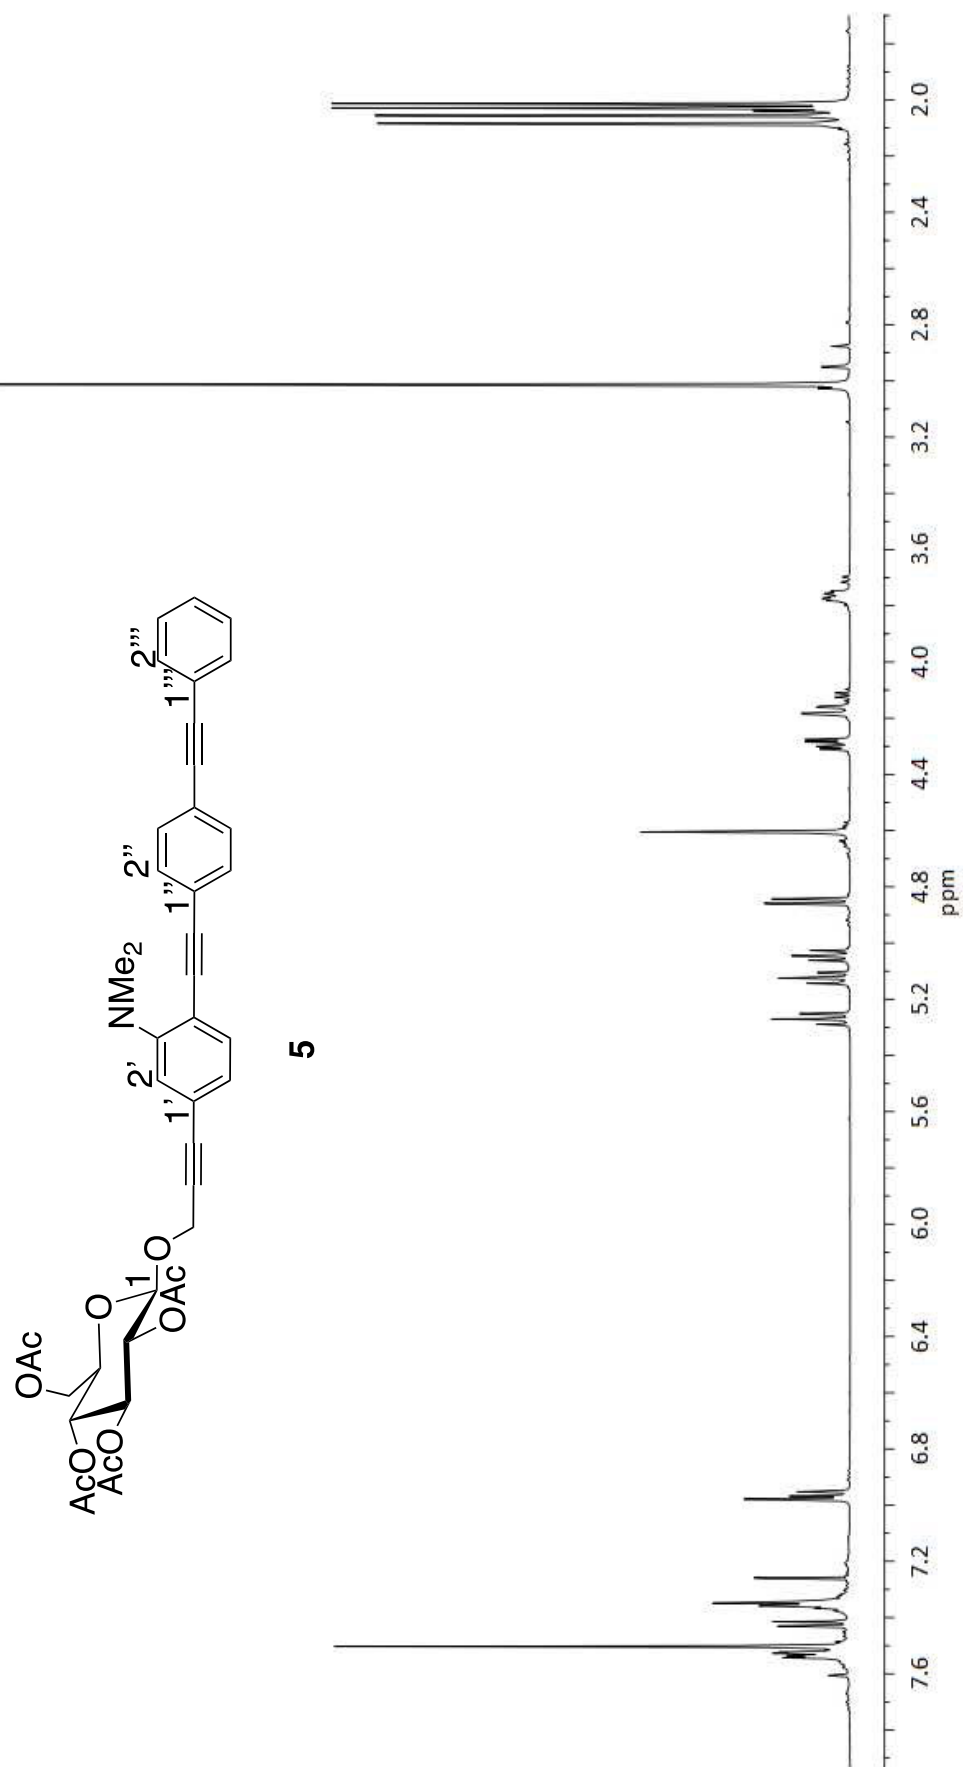

Figure S5. <sup>1</sup>H NMR of compound **5** in CDCl<sub>3</sub>

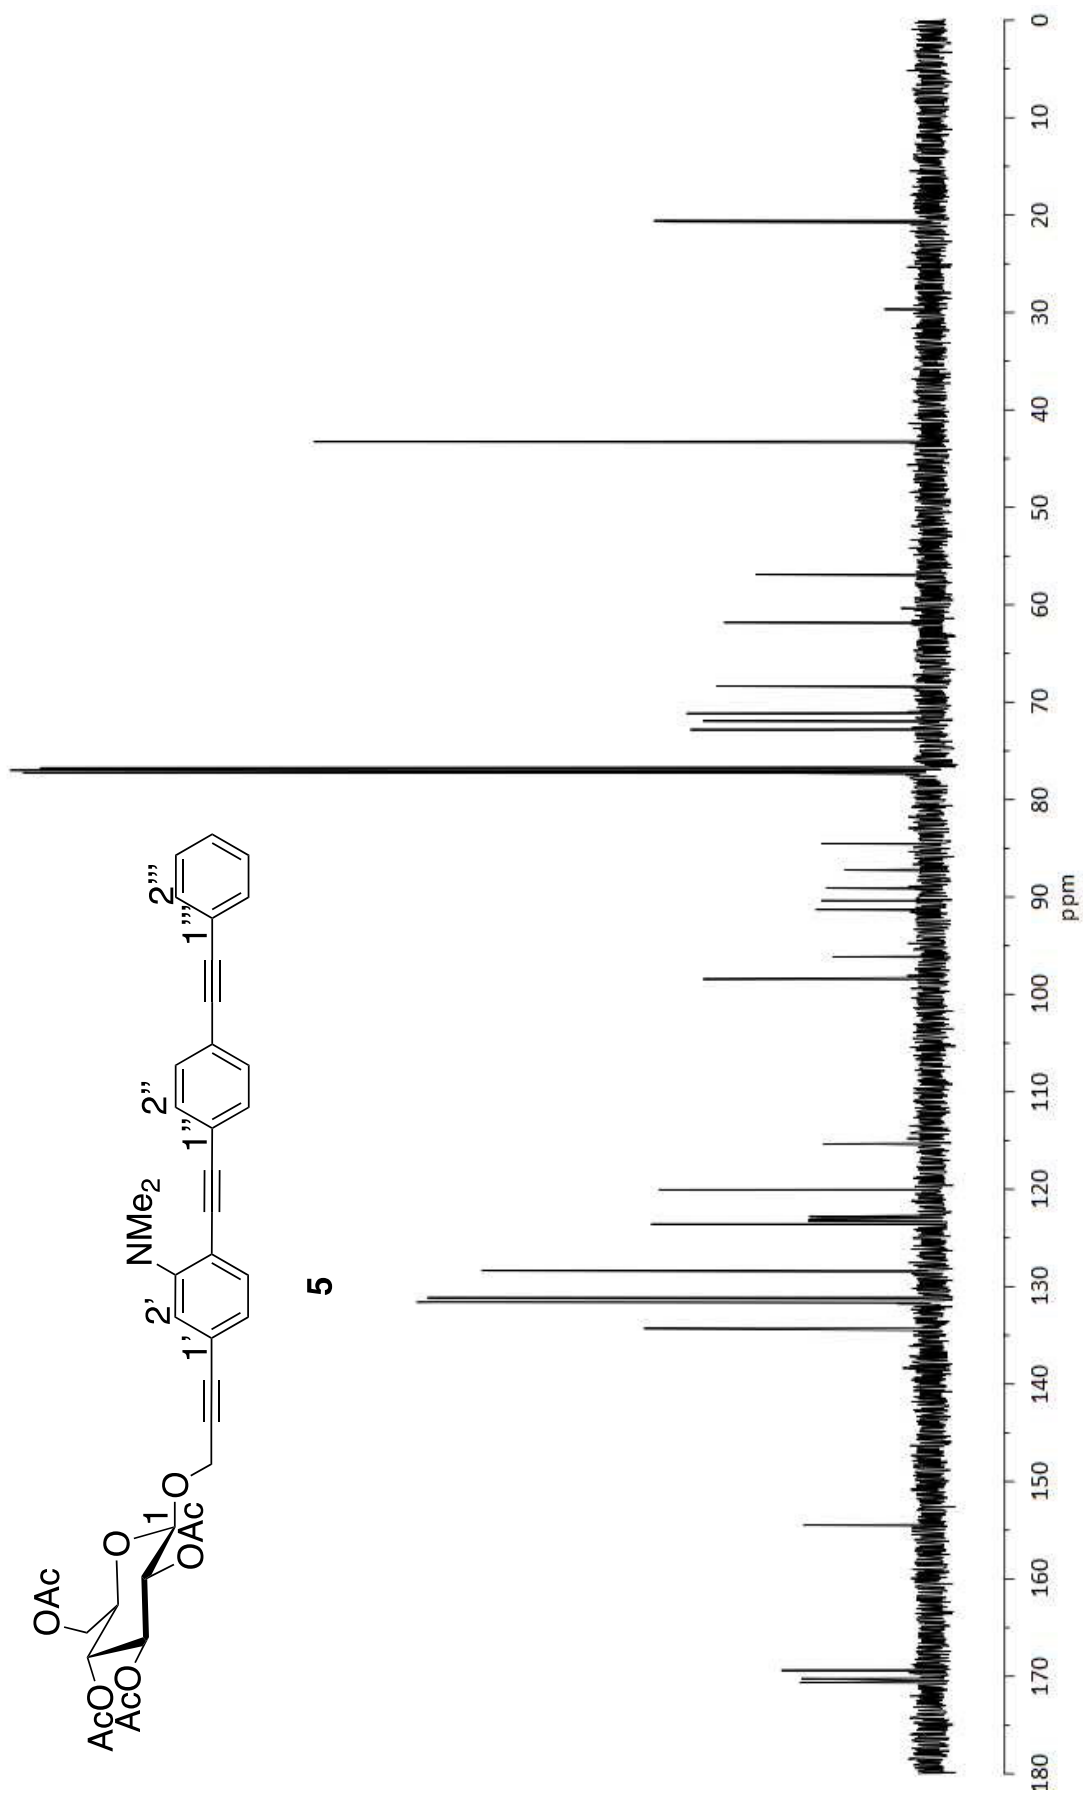

Figure S6. <sup>13</sup>C NMR of compound **5** in CDCl<sub>3</sub>

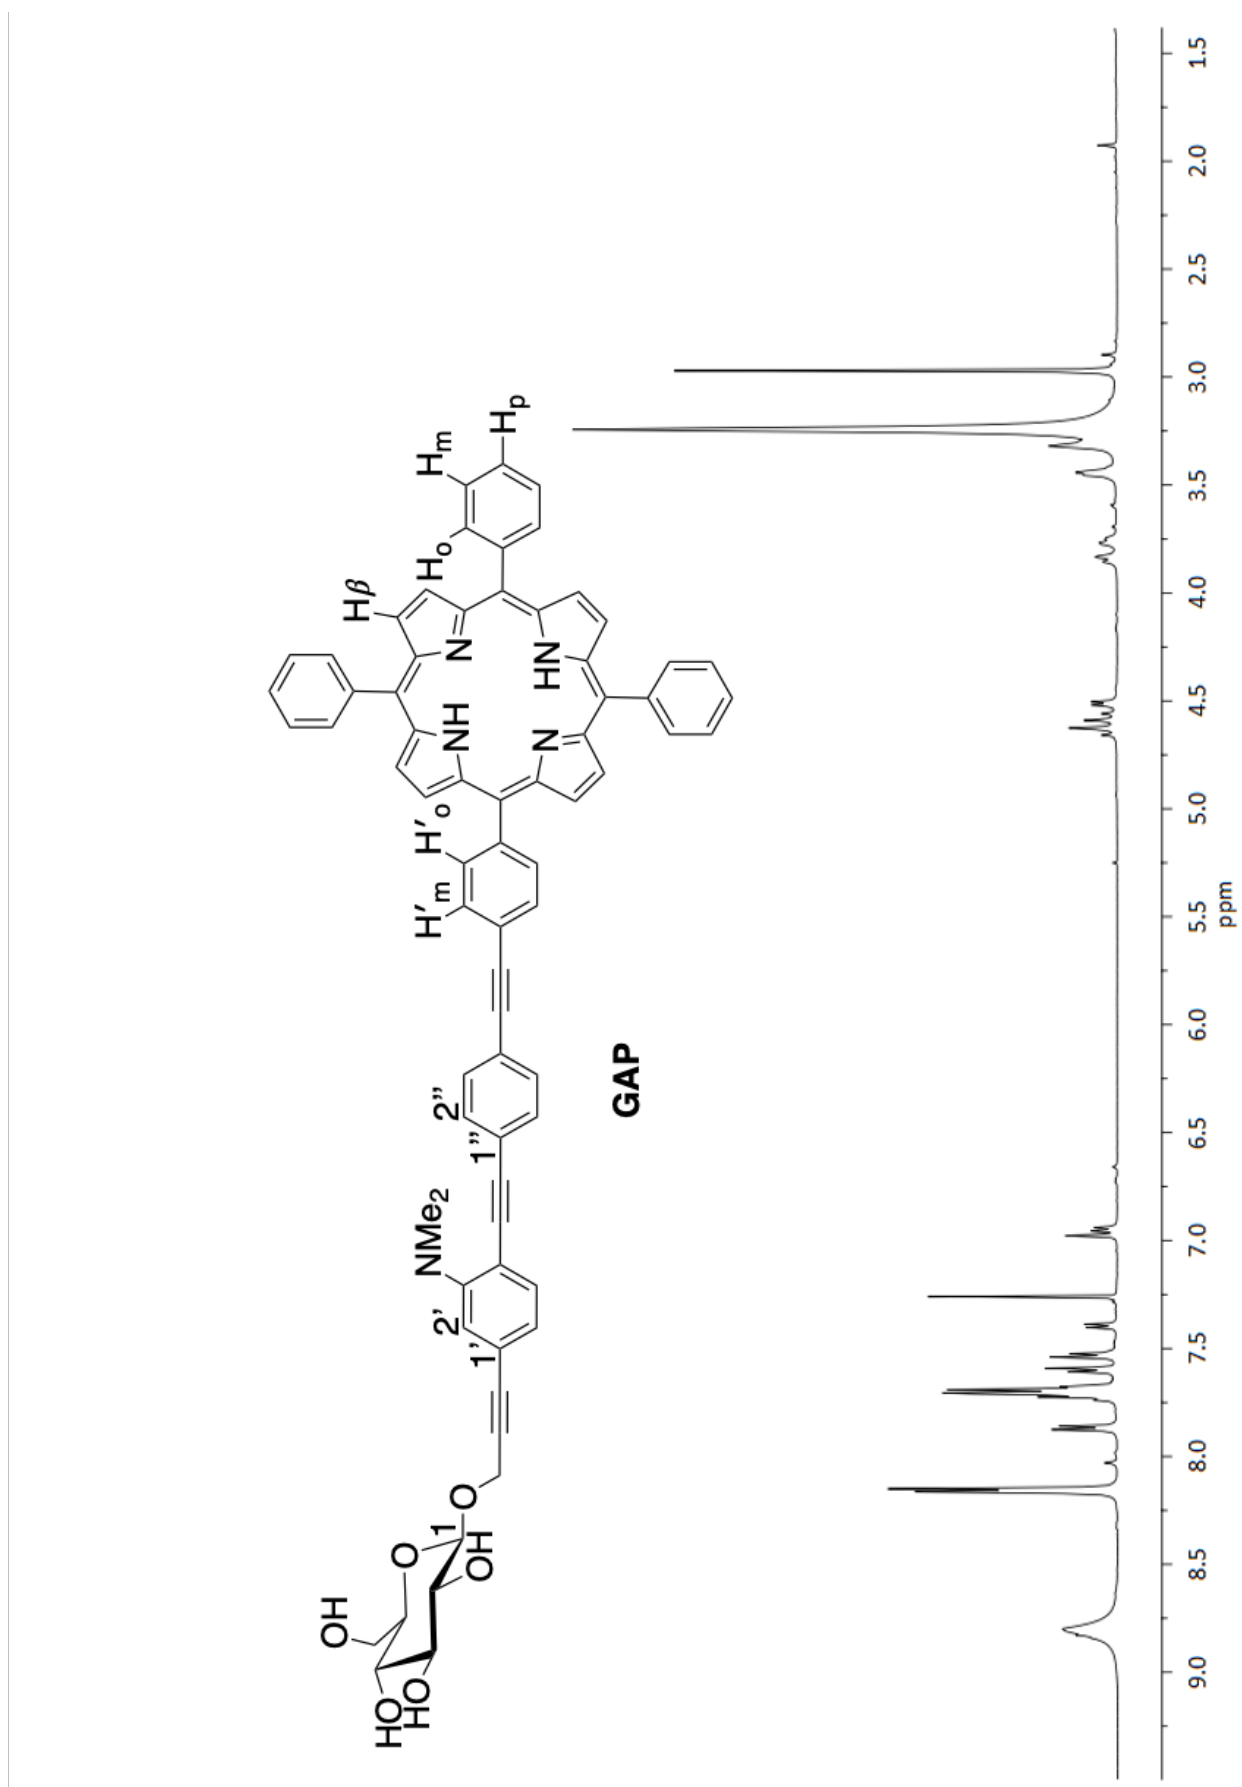

Figure S7. <sup>1</sup>H NMR of GAP in CDCl<sub>3</sub>/MeOD

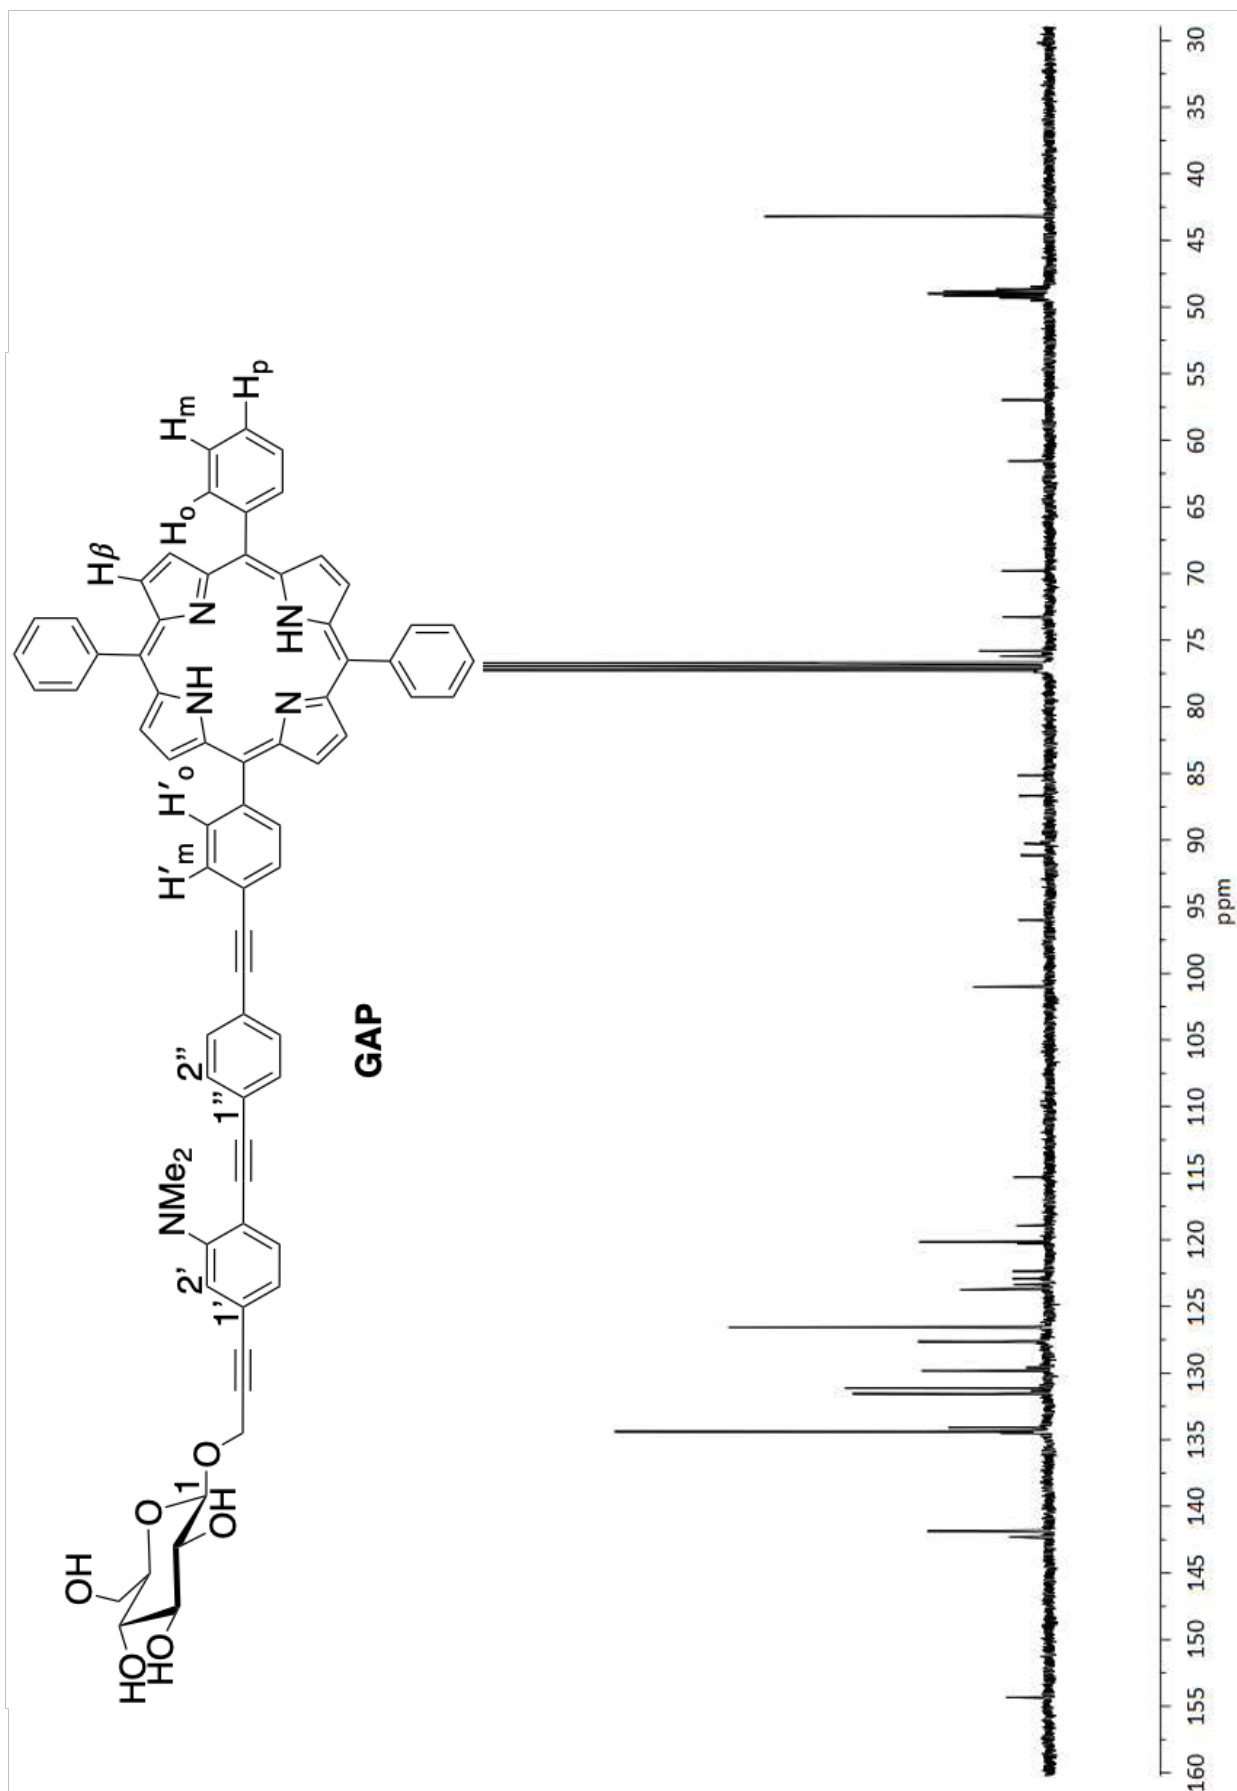

Figure S8.  $^{13}\text{C}$  NMR of GAP in  $\text{CDCl}_3/\text{MeOD}$

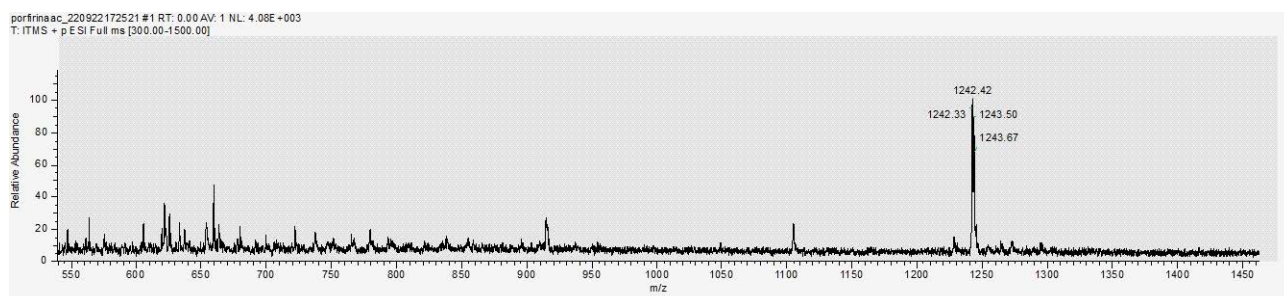

Figure S99. ESI/MS of compound 4

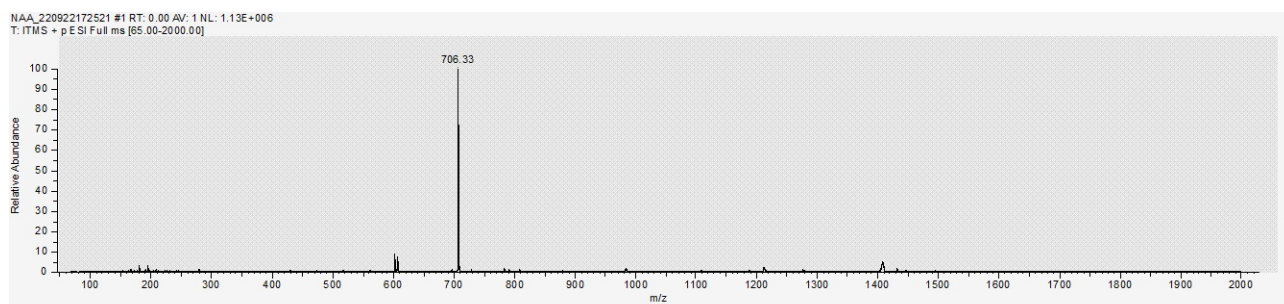

Figure S10. ESI/MS of compound 5

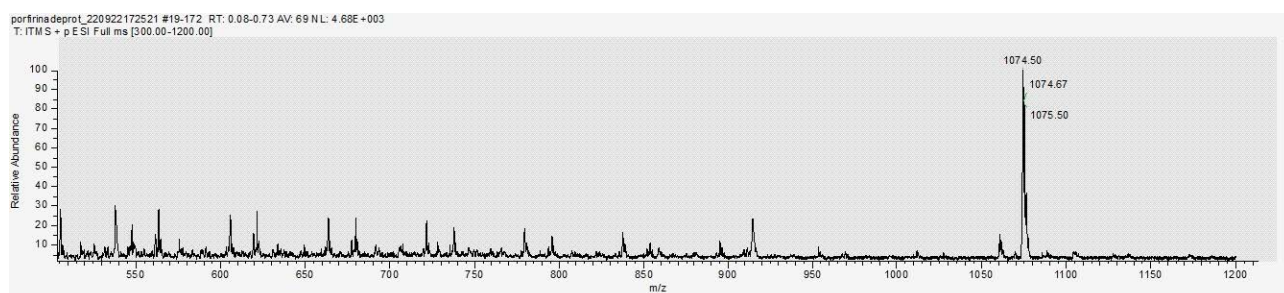

Figure S10. ESI/MS of GAP

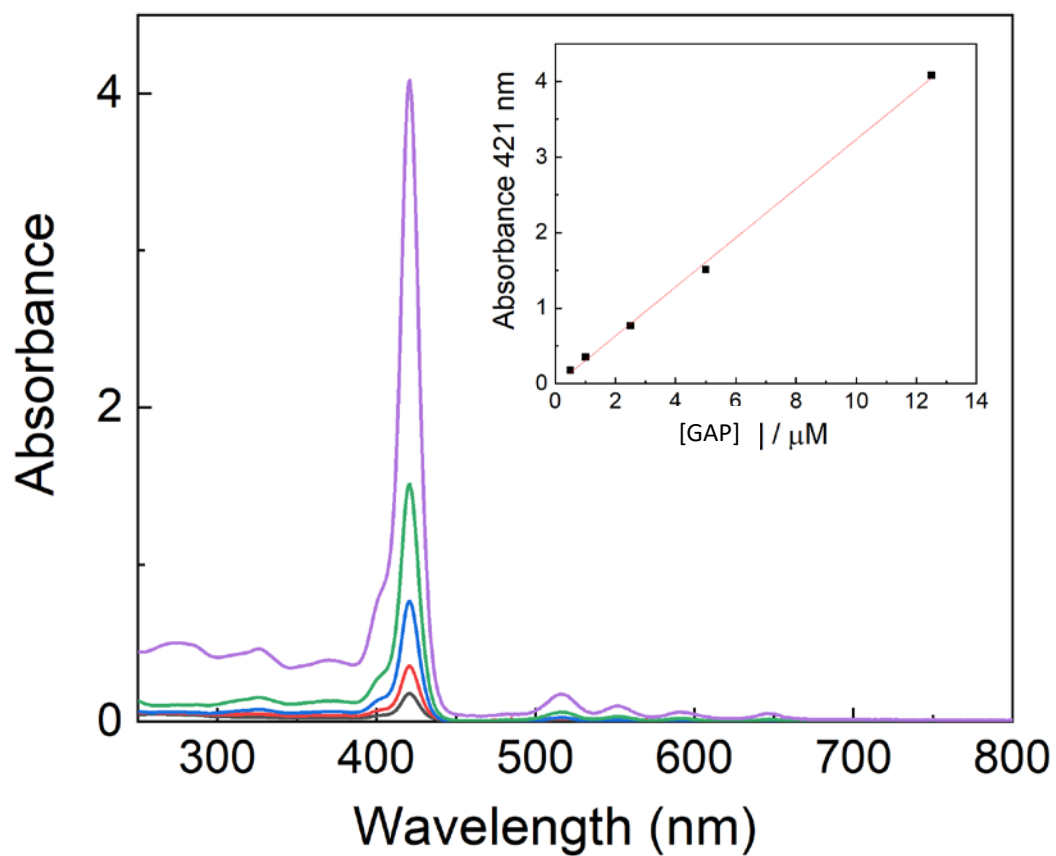

**Figure S12.** Absorption spectrum of GAP in chloroform,  $T = 298$  K. In the inset: Beer's plot.

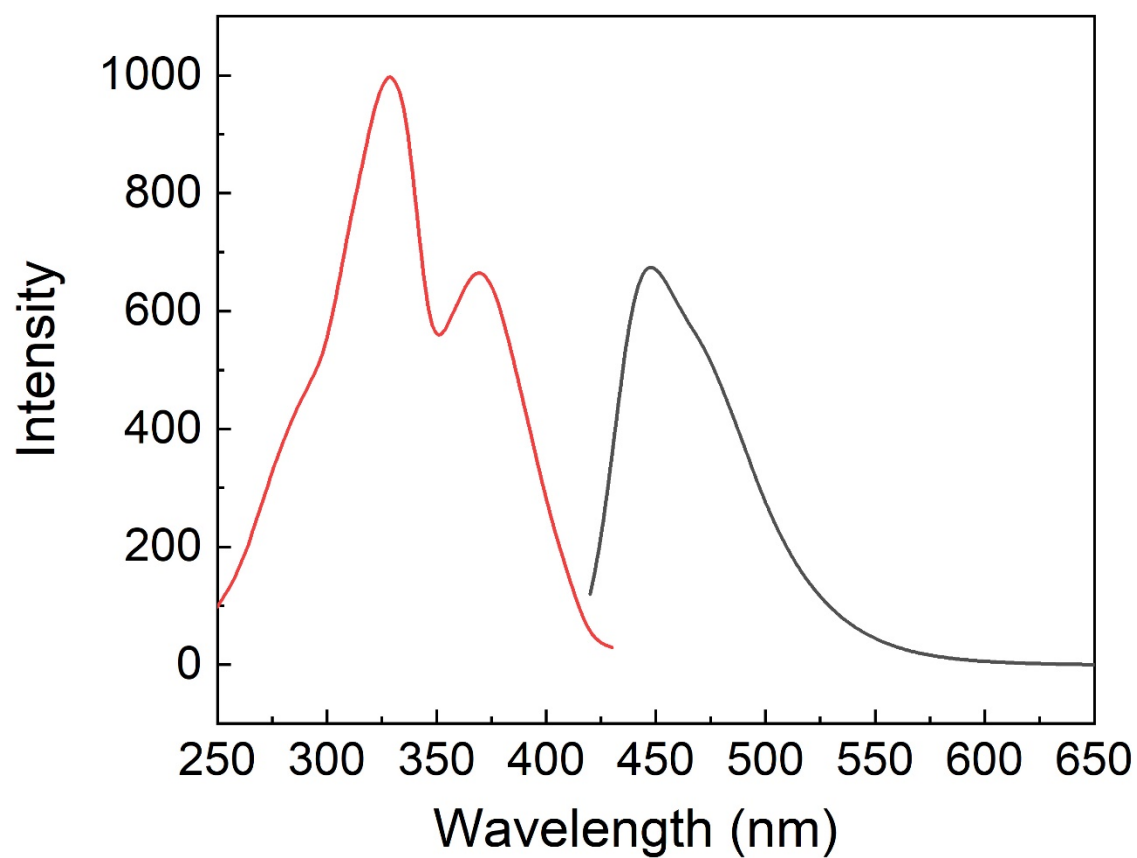

**Figure S13.** Excitation (red line) and emission (black line) spectra of OPE 5 in chloroform,  $\lambda_{\text{ex}} = 390\text{nm}$ ;  $\lambda_{\text{em}} = 450\text{ nm}$ ;  $T = 298\text{ K}$ .



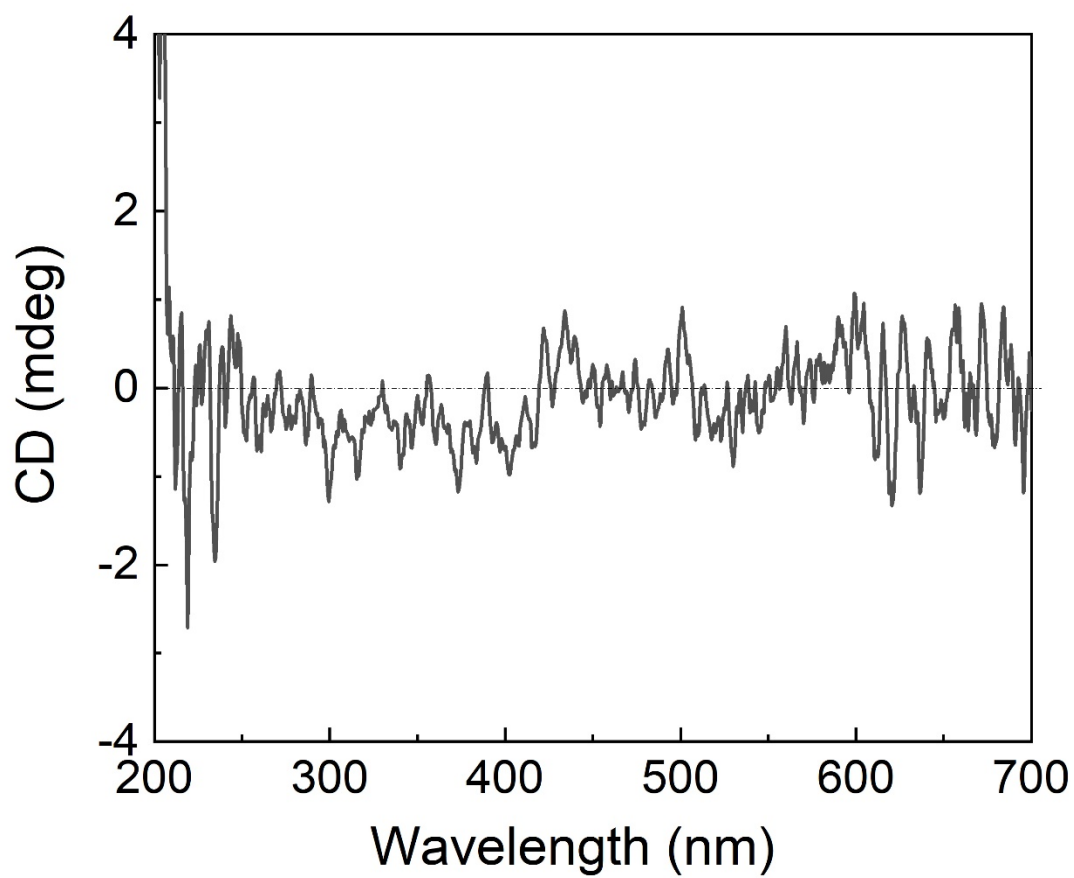

**Figure S14.** CD spectrum of GAP in chloroform, T = 298 K.

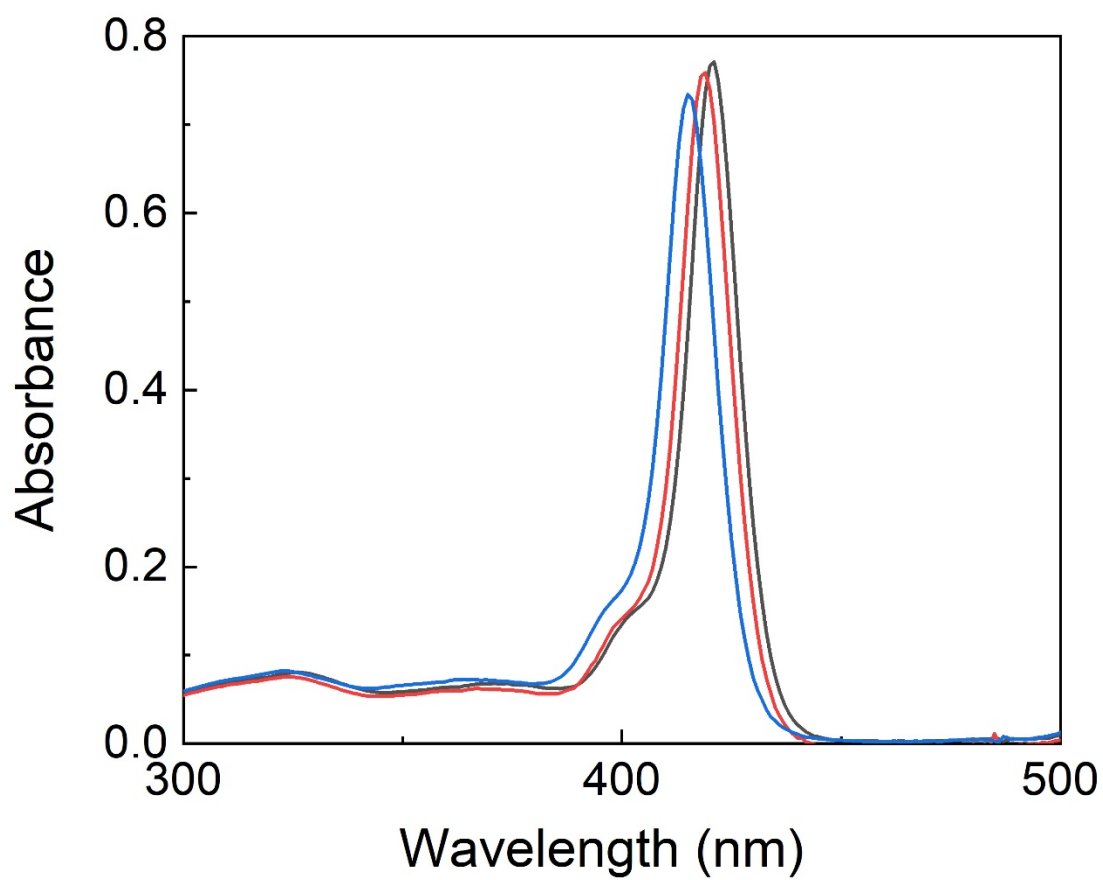

**Figure S15.** Absorption spectra of GAP in chloroform (black line), chloroform/methanol 50/50 v/v (red line); methanol (blue line). [GAP] = 2.5  $\mu$ M, T = 298 K.

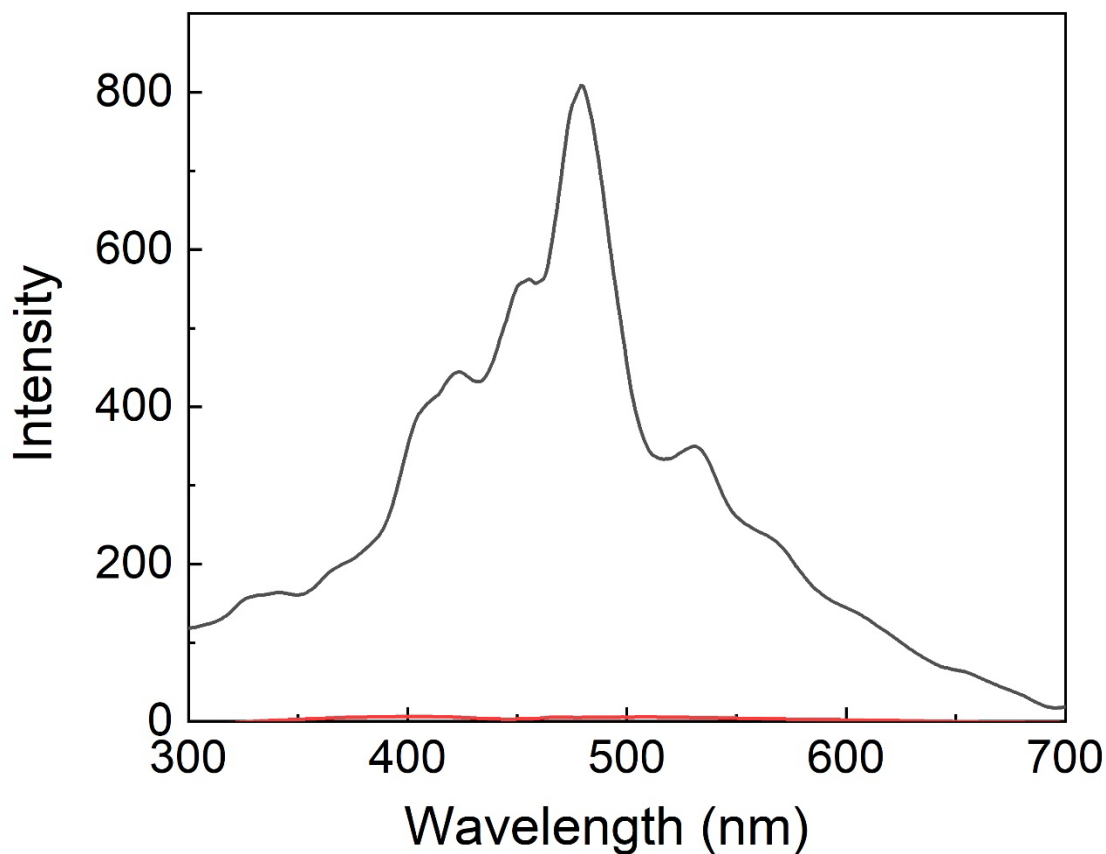

**Figure S16.** RLS spectra of GAP in methanol (red line), water/methanol/ 40/60 v/v (black line). [GAP] = 2.5  $\mu$ M, T = 298 K.

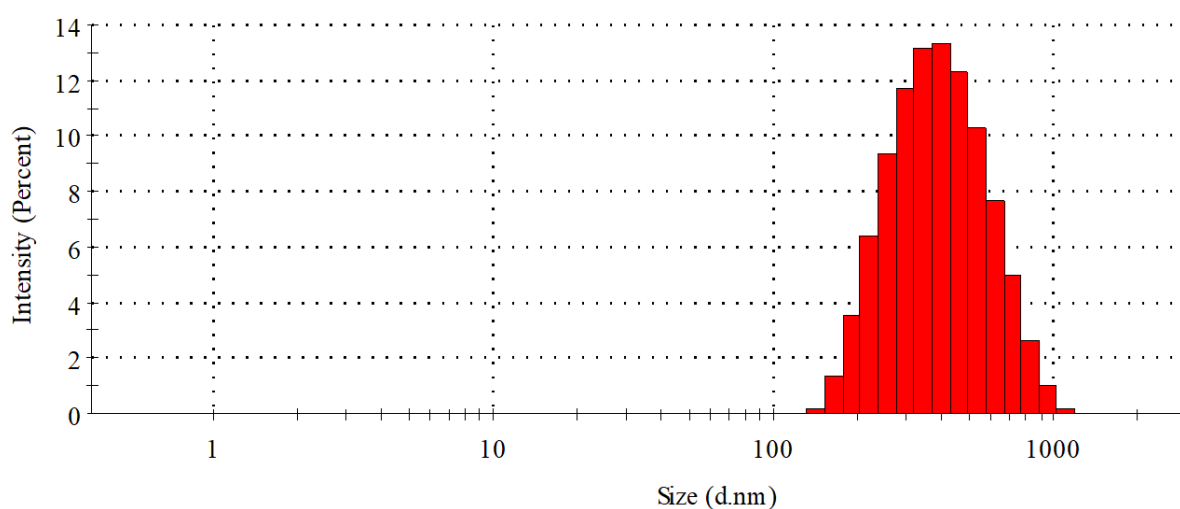

**Figure S17.** DLS intensity distribution of GAP in water/methanol/ 40/60 v/v. [GAP] = 2.5  $\mu$ M, T = 298 K.

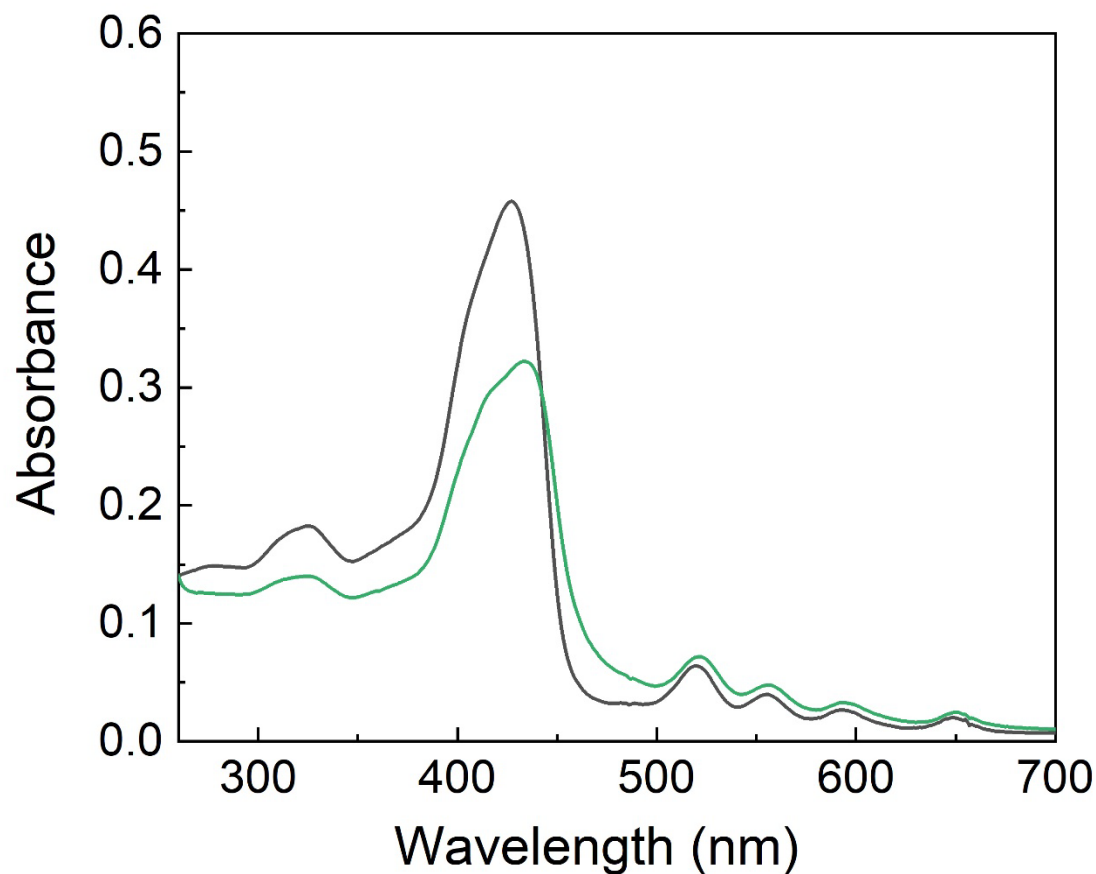

**Figure S18.** Absorption spectrum of GAP in water/methanol/ 40/60 v/v (black line) and in presence of KI (green line). [GAP] = 2.5  $\mu$ M, [KI] =5mM,  $T$  = 298 K.

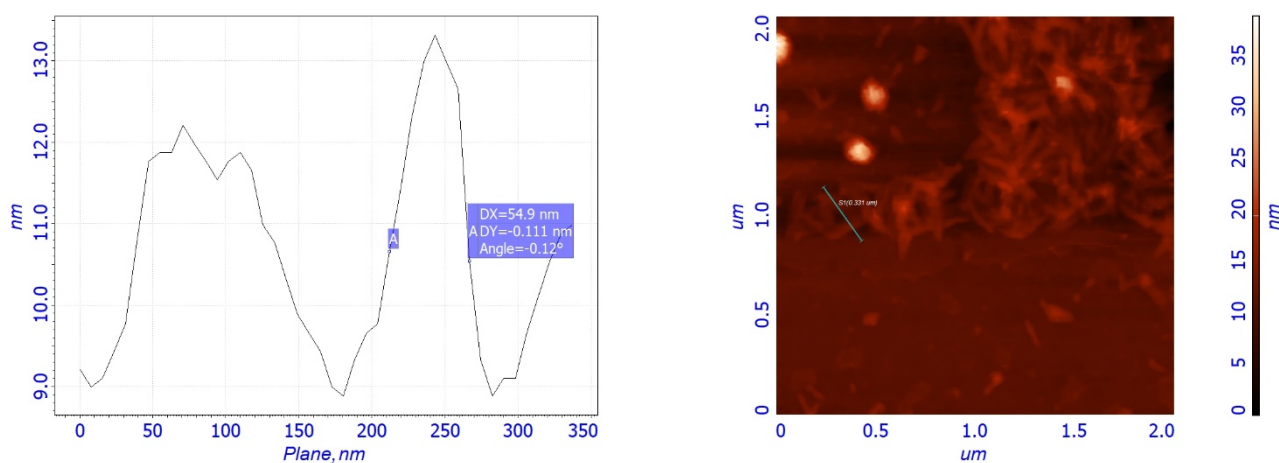

**Figure S19** AFM image and relative profile of GAP aggregates on silicon surface. GAP 1  $\mu$ M in 60/40 v/v methanol/water dropped and evaporated at room temperature on silicon surface.

**References**

1. L. M. Scolaro, A. Romeo, M. A. Castriciano, G. De Luca, S. Patane and N. Micali, *J. Am. Chem. Soc.*, 2003, **125**, 2040-2041.
2. E. Deni, A. Zamarron, P. Bonaccorsi, M. C. Carreno, A. Juarranz, F. Puntoriero, M. T. Sciortino, M. Ribagorda and A. Barattucci, *Eur. J. Med. Chem.* 2016, **111**, 58-71.
3. Zhao, Y.; Liu, L.; Zhang, W.; Sue, C.; Li, Q.; Miljanić, O. Š.; Yaghi, O. M.; Stoddart, J. F., *Chem. Eur. J.* 2009, **15**, 13356-13360.
4. A. R. McDonald, N. Franssen, G. P. M. van Klink and G. van Koten, *J. Organomet. Chem.*, 2009, **694**, 2153-2162.
5. L. Minuti, A. Barattucci, P. M. Bonaccorsi, M. L. Di Gioia, A. Leggio, C. Siciliano and A. Temperini *Org. Lett.*, 2013, **15**, 3906 - 3909.
